# Supplementary material
Source: publisher site journal article supplement (http://static.cambridge.org/content/id/urn:cambridge.org:id:article:S0924933819000099/resource/name/S0924933819000099supp001.docx)

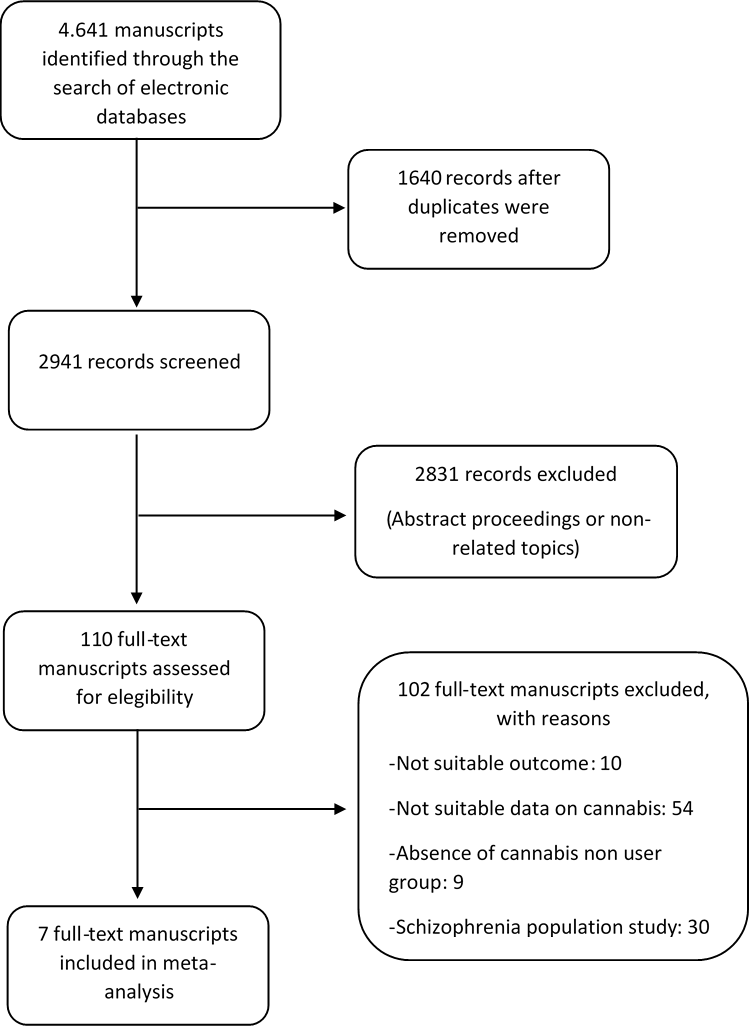


**Supplementary material 1: PRISMA flowchart of the study selection process**

Supplement: Supplementary file 1 [file S0924933819000099supp001.docx]
